# Supplementary material for: Selective reporting of outcomes and results in interrupted time series studies of health interventions: a methodological study
Source: Research Square preprint supplement (doi:10.21203/rs.3.rs-8090224/v1), 2025-11-26
Supplement: Supplementary file 2 [file f8d6bdc39ec476f398ee2c6e.docx]

# **Selective reporting of outcomes and results in interrupted time series studies of health interventions: a methodological study**

# **Table 1. Framework for outcome definition**

| **Elements** | **Elaboration** | **Examples** |
| --- | --- | --- |
| 1: Domain | Concept to describe one or more outcomes  Can be broad or specific. | Health outcomes  Cardiovascular outcomes  Systolic blood pressure (SBP) |
| 2: Specific measure | Tool used to measure the outcome domain, which can be:  a) An instrument  b) A scale or questionnaire, including whether the total scale or subscale is used  c) A laboratory test, including the information that distinguishes different types of test, such as the biomarker, antigen detected, or type of sample collected.  d) A clinical definition for outcomes that can be assessed by observations and not requiring a scale or instrument | a) Glucometer to measure fasting blood glucose  b) Functional Independence Measure (FIM): total score or motor subscale score  c) Dengue tests: Non-structural protein 1 (NS1) test or immunoglobulin M (IgM) test  d) Major Adverse Cardiac Events (MACE) |
| 3: Time points | Timing of outcome measurement or assessment, which could be:  a) at specific time point(s); or,  b) within a period of time. | a) SBP measured 24-hours post-intervention  b) Infection within 30 days of discharge |
| 4: Data type of individual measurements | Data type of the measurements at the individual level | Continuous: SBP, birth weight, cost of treatment  Count: length of hospital stay, weekly step count  Binary: pregnancy status |
| 5: Data type at aggregation | Data type of outcome used in the time series analysis. This outcome is usually constructed by aggregating individual level measurements using summary statistics (e.g. counts, means, proportions) over intervals of time (e.g., weekly, monthly, yearly). A transformation may be applied to the individual level measurements prior to aggregation (e.g., dichotomising a continuous outcome). | Count: number of positive HIV tests  Continuous: mean birth weight  Proportion: proportion of patients with SBP >200mmHg  Rate: incidence of infections per 1,000 *catheter-days* |
| **Example of a well-defined outcome**  **Systolic blood pressure (SBP)** *[domain]*, measured in **mmHg** *[data type of individual measurements (continuous)]* using a **sphygmomanometer** *[specific measure]*, at **24 hours** *[time point]* after IV administration of drug. The monthly **proportion of patients** *[data type at aggregation (proportion)]* with SBP over 180mmHg will be analysed using segmented linear regression. | | |

*Notes: This framework was adapted from Zarin et al. (2011)* [[1]](#footnote-1) *and Dickersin et al. (2018)* [[2]](#footnote-2)*. For more details on how we distinguish between similar outcomes and match an outcome from a protocol with an outcome from a results report, see Supplementary File S5 (section 5.4).*

# **Table 2. Characteristics of included studies**

| **Characteristic** | **No. ITS studies (%)  (N=44)** |
| --- | --- |
| Focus of the study |  |
| Only ITS study | 11 (25%) |
| ITS and other study designs | 33 (75%) |
| Type of funding |  |
| No funding | 1 (2%) |
| Non-industry funding | 37 (84%) |
| Industry funding | 6 (14%) |
| Study registration | 22 (50%) |
| Nature of the interruption |  |
| Exposure (natural events) | 0 (0%) |
| Intervention | 44 (100%) |
| Practice change in a clinical setting | 25 (57%) |
| Health system interventions | 8 (18%) |
| Policy & regulatory changes | 6 (14%) |
| Social & economic interventions | 3 (7%) |
| Environmental interventions | 2 (5%) |
| Other | 0 (0%) |
| Level at which the intervention was implemented |  |
| Unit-based or institutional | 18 (41%) |
| Regional | 8 (18%) |
| National | 17 (39%) |
| Multinational | 1 (2%) |
| Level at which the intervention was evaluated |  |
| Unit-based or institutional | 21 (48%) |
| Regional | 10 (23%) |
| National | 12 (27%) |
| Multinational | 1 (2%) |
| Country where study was conducted† |  |
| High-income countries | 36 (82%) |
| Upper middle-income countries | 3 (7%) |
| Lower middle-income countries | 4 (9%) |
| Low-income countries | 1 (2%) |
| Timing of data collection relative to the protocol’s submission |  |
| Retrospective | 17 (39%) |
| Prospective | 27 (61%) |

*Notes: For details of how we defined the options for each characteristic, refer to Supplementary File S3 (Data extraction form). Abbreviation: ITS: interrupted time series*

†*Based on World Blank Group’s FY25 income classification. Total of percentages may exceed 100% as multiple response options could apply.*

# **Table 3. Characteristics of included outcomes**

| **Characteristics of outcomes** | **All outcomes (N=572)** | **Outcomes reported in protocols (N=516)** | **Outcomes reported in results reports (N=433)** |
| --- | --- | --- | --- |
| No. outcomes per study*, median (IQR) | 6 (2 to 13) | 6 (2 to 13) | 4 (2 to 10) |
| Impact outcomes, n (%) | 553 (97%) | 498 (97%) | 421 (97%) |
| Control outcomes, n (%) | 19 (3%) | 18 (3%) | 12 (3%) |
| Matching between protocols & results reports |  |  |  |
| One-to-one, n (%) | 234 (41%) | 234 (45%) | 212 (49%) |
| One-to-many, n (%) | 165 (29%) | 165 (32%) | 165 (38%) |
| Cannot be matched, n (%) | 173 (30%) | 117 (23%) | 56 (13%) |
| Type of analysis |  |  |  |
| ITS analysis, n (%) | - | 465 (90%) | 284 (66%) |
| Other types of analysis, n (%) | - | 0 (0%) | 149 (34%) |
| Unclear if ITS analysis, n (%) | - | 51 (10%) | 0 (0%) |
| Outcome primacy |  |  |  |
| Primary outcome, n (%) | - | 52 (10%) | 46 (9%) |
| Secondary outcome, n (%) | - | 244 (47%) | 157 (30%) |
| Could not be classified, n (%) | - | 202 (39%) | 218 (42%) |

*Abbreviation: IQR: interquartile range; ITS: interrupted time series*

**44 studies*

# **Table 4. Patterns and discrepancies in reporting of outcomes**

|  | **No. outcomes (%)** | **No. outcomes per study, median (IQR) (44 studies)** | **Percentage of outcomes per study, median (IQR) (44 studies)** |
| --- | --- | --- | --- |
| **By completeness of reporting at the outcome level† (n=553)** |  |  |  |
| All results were fully reported | 315 (57%) | 1 (0 to 4) | 27% (0% to 100%) |
| At least one result was fully reported but not all | 47 (8%) | 0 (0 to 0) | 0% (0% to 0%) |
| At least one result was partially reported, but none was fully reported | 12 (2%) | 0 (0 to 0) | 0% (0% to 0%) |
| Only qualitatively reported results | 47 (8%) | 0 (0 to 0) | 0% (0% to 0%) |
| No result was reported | 132 (24%) | 1 (0 to 4) | 16% (0% to 46%) |
|  |  |  |  |
| **By type of discrepancies (n=388*)** |  |  |  |
| No discrepancy | 186 (48%) | 2 (0 to 5) | 40% (0% to 83%) |
| Discrepancy | 202 (52%) | 2 (0 to 6) | 27% (0% to 71%) |
| Missing in protocol | 55 (14%) | 0 (0 to 0) | 0% (0% to 3%) |
| Missing in results report | 132 (34%) | 1 (0 to 4) | 14% (0% to 46%) |
| Discrepancy in outcome primacy | 15 (4%) | 0 (0 to 0) | 0% (0% to 0%) |
| Primary outcome was demoted to secondary/unclassified outcome | 4 (1%) | 0 (0 to 0) | 0% (0% to 0%) |
| Secondary/unclassified outcome was promoted to primary outcome | 11 (3%) | 0 (0 to 0) | 0% (0% to 0%) |

*Abbreviation: IQR: interquartile range; ITS: interrupted time series*

*†Each outcome can have multiple results. For example, after fitting a segmented linear regression, the authors can report two results for each outcome: an estimate of the slope change and an estimate of the immediate level change.*

**Excluding outcomes with one-to-many matches and control outcomes.*

# **Table 5. Characteristics of results**

|  | **No. results (%)  (N=860)** | **No. results per results report, median (IQR) (44 studies)** | **Percentage of results per results report, median (IQR) (44 studies)** | **No. results per outcome, median (IQR) (572 outcomes)** | **Percentage of results per outcome, median (IQR) (572 outcomes)** |
| --- | --- | --- | --- | --- | --- |
| Completeness of reporting |  |  |  |  |  |
| Fully reported | 741 (86%) | 6 (4 to 18) | 100% (85% to 100%) | 1 (0 to 2) | 100% (0% to 100%) |
| Partially reported | 28 (3%) | 0 (0 to 0) | 0% (0% to 0%) | 0 (0 to 0) | 0% (0% to 0%) |
| Qualitatively reported | 91 (11%) | 0 (0 to 0) | 0% (0% to 0%) | 0 (0 to 0) | 0% (0% to 0%) |
| Statistical significance of the result |  |  |  |  |  |
| Significant | 283 (33%) | 4 (1 to 10) | 32% (21% to 61%) | 0 (0 to 1) | 0% (0% to 38%) |
| Not significant | 536 (62%) | 6 (2 to 12) | 56% (33% to 75%) | 1 (0 to 1) | 50% (0% to 100%) |
| Cannot be determined | 41 (5%) | 0 (0 to 0) | 0% (0% to 0%) | 0 (0 to 0) | 0% (0% to 0%) |
| Direction of the result |  |  |  |  |  |
| Favourable to the interruption | 471 (55%) | 6 (2 to 12) | 58% (41% to 83%) | 0 (0 to 1) | 0% (0% to 100%) |
| Favourable to the comparator/neither side | 348 (40%) | 4 (1 to 8) | 33% (7% to 55%) | 0 (0 to 1) | 0% (0% to 100%) |
| Cannot be determined | 41 (5%) | 0 (0 to 0) | 0% (0% to 0%) | 0 (0 to 0) | 0% (0% to 0%) |
| Overall favourable status of the result† |  |  |  |  |  |
| Favourable to the interruption | 201 (23%) | 2 (1 to 8) | 20% (3% to 50%) | 0 (0 to 0) | 0% (0% to 0%) |
| Not favourable to the interruption | 641 (75%) | 8 (2 to 16) | 77% (43% to 91%) | 1 (0 to 1) | 96% (0% to 100%) |
| Cannot be determined | 18 (2%) | 0 (0 to 0) | 0% (0% to 0%) | 0 (0 to 0) | 0% (0% to 0%) |

*Abbreviation: IQR: interquartile range*

*†The overall favourable status was determined based on two conditions: (A) the result was statistically significant (i.e. P value <0.05, or if absent, the 95% CI excluded the null, or the authors stated the result was statistically significant), and (B) the direction of the effect was favourable to the interruption (i.e. the effect estimate indicated greater benefit or less harm compared with the control).*

- *If both (A) and (B) are true, the result was classified as “favourable to the interruption”.*
- *If either (A) and (B) is false, the result was classified as “not favourable to the interruption”.*
- *If there is insufficient information to classify, such as when (A) is true and (B) is unclear, (B) is true and (A) is unclear, or both (A) and (B) are unclear, the result was classified as “could not be determined”.*

# **Table 6. Justification for outcome discrepancies**

| **Reason** | **No. of outcomes affected (%)  (N=202a)** | **No. of studies affected (%) (N=31b)** |
| --- | --- | --- |
| **For not reporting a planned outcome in the results report** | | |
| Rates of outcomes were too low to undertake the analysis | 22 (11%) | 4 (13%) |
| Outcome was deemed unsuitable in evaluating the effect of intervention | 20 (10%) | 3 (10%) |
| Data were missing (no specific reason given) | 3 (1%) | 2 (6%) |
| Outcome was not accurately measured | 2 (<1%) | 2 (6%) |
| Outcome was deemed unnecessary by authors | 2 (<1%) | 2 (6%) |
| **For adding a new outcome in the results report** | | |
| Outcome was added after data for originally planned outcomes could not be collected | 5 (2%) | 1 (3%) |
| Outcome was added after the original outcome was not accurately measured | 1 (<1%) | 1 (3%) |
| Outcome was added after the original outcomes were deemed unsuitable | 1 (<1%) | 1 (3%) |
| **Total** | **56 (28%)** | **11 (35%)c** |

*aTotal number of outcomes with discrepancies*

*bTotal number of studies with discrepancies*

*cTotal of number of studies may exceed 11 because some studies had more than one type of justification provided.*

1. *Zarin DA, Tse T, Williams RJ, Califf RM, Ide NC. The ClinicalTrials. gov results database—update and key issues. New England Journal of Medicine. 2011 Mar 3;364(9):852-60.* [↑](#footnote-ref-1)
2. *Dickersin K, Mayo-Wilson E, Li T. The Benefits and Challenges of Using Multiple Sources of Information about Clinical Trials. Patient-Centered Outcomes Research Institute (PCORI). 2018. https://doi.org/10.25302/3.2018.ME.13035785* [↑](#footnote-ref-2)
